# Supplementary material
Source: PubMed Central journal article supplement (PMC8132494)
Supplement: NIHMS1675830-supplement-1.pdf [file NIHMS1675830-supplement-1.pdf]

| Parameter                      | 0    | 1                                                                   | 2                                                                                                                         | 3                                                                                                             |
|--------------------------------|------|---------------------------------------------------------------------|---------------------------------------------------------------------------------------------------------------------------|---------------------------------------------------------------------------------------------------------------|
| <b>Cough Score</b><br>_____    | None | Coughs at specific times of day (feeding/exercising/making beds)    | Frequent cough with periods of no coughing                                                                                | Very frequent cough                                                                                           |
| <b>Nostril Flare</b><br>_____  | None | Flares during inspiration (returns to normal at end of inspiration) | Flares in inspiration and exhalation (slight movement can still be seen)                                                  | Flares in inspiration and expiration (no movement can be seen)                                                |
| <b>Abdominal Lift</b><br>_____ | None | Slight flattening of ventral flank                                  | Obvious abdominal flattening and "heave line" extending no more than halfway between cubital joint and <i>tuber coxae</i> | Obvious abdominal lift and "heave line" extending beyond halfway between cubital joint and <i>tuber coxae</i> |

REBREATHING EXAM (if indicated)

|                                          |                   | <i>Cranial Dorsal</i>              | <i>Cranial Ventral</i>             | <i>Caudal Dorsal</i>               | <i>Caudal Ventral</i>              |
|------------------------------------------|-------------------|------------------------------------|------------------------------------|------------------------------------|------------------------------------|
| <b>Lung sounds before bag is applied</b> | <i>Left Lung</i>  | <input type="checkbox"/> Normal    | <input type="checkbox"/> Normal    | <input type="checkbox"/> Normal    | <input type="checkbox"/> Normal    |
|                                          |                   | <input type="checkbox"/> Decreased | <input type="checkbox"/> Decreased | <input type="checkbox"/> Decreased | <input type="checkbox"/> Decreased |
|                                          |                   | <input type="checkbox"/> Increased | <input type="checkbox"/> Increased | <input type="checkbox"/> Increased | <input type="checkbox"/> Increased |
|                                          | Describe: _____   |                                    | Describe: _____                    | Describe: _____                    | Describe: _____                    |
|                                          | <i>Right Lung</i> | <input type="checkbox"/> Normal    | <input type="checkbox"/> Normal    | <input type="checkbox"/> Normal    | <input type="checkbox"/> Normal    |
|                                          |                   | <input type="checkbox"/> Decreased | <input type="checkbox"/> Decreased | <input type="checkbox"/> Decreased | <input type="checkbox"/> Decreased |
| <input type="checkbox"/> Increased       |                   | <input type="checkbox"/> Increased | <input type="checkbox"/> Increased | <input type="checkbox"/> Increased |                                    |
| Describe: _____                          |                   | Describe: _____                    | Describe: _____                    | Describe: _____                    |                                    |
| <b>Lung sounds after bag is applied</b>  | <i>Left Lung</i>  | <input type="checkbox"/> Normal    | <input type="checkbox"/> Normal    | <input type="checkbox"/> Normal    | <input type="checkbox"/> Normal    |
|                                          |                   | <input type="checkbox"/> Decreased | <input type="checkbox"/> Decreased | <input type="checkbox"/> Decreased | <input type="checkbox"/> Decreased |
|                                          |                   | <input type="checkbox"/> Increased | <input type="checkbox"/> Increased | <input type="checkbox"/> Increased | <input type="checkbox"/> Increased |
|                                          | Describe: _____   |                                    | Describe: _____                    | Describe: _____                    | Describe: _____                    |
|                                          | <i>Right Lung</i> | <input type="checkbox"/> Normal    | <input type="checkbox"/> Normal    | <input type="checkbox"/> Normal    | <input type="checkbox"/> Normal    |
|                                          |                   | <input type="checkbox"/> Decreased | <input type="checkbox"/> Decreased | <input type="checkbox"/> Decreased | <input type="checkbox"/> Decreased |
| <input type="checkbox"/> Increased       |                   | <input type="checkbox"/> Increased | <input type="checkbox"/> Increased | <input type="checkbox"/> Increased |                                    |
| Describe: _____                          |                   | Describe: _____                    | Describe: _____                    | Describe: _____                    |                                    |

How many breaths does it take to recover? \_\_\_\_\_

Examiner Signature: \_\_\_\_\_
